# Supplementary material
Source: PubMed Central journal article supplement (PMC10560384)

## **Occupational Insecticide Exposure and Risk of Non-Hodgkin Lymphoma: A Pooled Case-Control Study from the InterLymph Consortium**

Anneclaire J. De Roos, Leah H. Schinasi, Lucia Miligi, James R. Cerhan, Parveen Bhatti, Andrea 't Mannetje, Dalsu Baris, Yolanda Benavente, Geza Benke, Jacqueline Clavel, Delphine Casabonne, Lin Fritschi, Jonathan N. Hofmann, Tran Huynh, Alain Monnereau, Sara Piro, Susan L. Slager, Claire M. Vajdic, Sophia S. Wang, Yawei Zhang, Leslie Bernstein, Pierluigi Cocco

### **Table of Contents:**

Supplemental Table 1. Frequency of insecticide use among controls within each of the case-control studies participating in the InterLymph study of insecticides

Supplemental Table 2. Associations between insecticide use and risks of NHL and NHL subtypes (available as a separate .xlsx file)

Supplemental Figure 1. Comparison of studies with exposure coding based on expert assessment or self-report, for the association between ever use of insecticides (vs. never-use) and risk of all NHL. Odds ratio (OR) and 95% confidence interval (CI) with adjustment in the main analysis for study center, age, gender, socioeconomic status (SES), herbicides, and other non-insecticide pesticides

Supplemental Figure 2. Random effects meta-analysis of the association between occupational insecticide use and NHL risk. Individual-study estimates are odds ratios (OR) and 95% confidence intervals (CI) for insecticide exposure (vs. never-use), with adjustment for study center, age, gender, socioeconomic status (SES), herbicides, and other non-insecticide pesticides

**Supplemental Table 1. Frequency of insecticide use among controls within each of the case-control studies participating in the InterLymph study of insecticides**

|                  | LAMMCC   | LANHL     | Italian   | Yale      | Epilymph  | NSW       | ENGELA    | Mayo        | BCMM      |
|------------------|----------|-----------|-----------|-----------|-----------|-----------|-----------|-------------|-----------|
| Insecticides     | 6 (2.2%) | 14 (3.8%) | 72 (6.3%) | 58 (8.2%) | 48 (2.0%) | 56 (8.2%) | 37 (8.3%) | 265 (12.1%) | 14 (3.8%) |
| Organochlorines  | 5 (1.8%) | 2 (0.5%)  | 71 (6.2%) | 12 (1.7%) | 29 (1.2%) | 8 (1.2%)  | 17 (3.8%) | 165 (7.6%)  | 6 (1.6%)  |
| DDT              | 5 (1.8%) | 2 (0.5%)  | 43 (3.8%) | 4 (0.6%)  | -         | 3 (0.4%)  | -         | 137 (6.3%)  | 6 (1.6%)  |
| Chlordane        | 2 (0.7%) | -         | -         | 7 (1.0%)  | -         | 2 (0.3%)  | -         | 48 (2.2%)   | -         |
| Lindane          | -        | -         | 5 (0.4%)  | 2 (0.3%)  | -         | -         | -         | 22 (1.0%)   | 0         |
| Dieldrin         | 0        | -         | -         | 0         | -         | 5 (0.7%)  | -         | 5 (0.2%)    | 0         |
| Organophosphates | 2 (0.7%) | 0         | 97 (8.5%) | 22 (3.1%) | 27 (1.1%) | 11 (1.6%) | 24 (5.4%) | 208 (9.5%)  | 2 (0.5%)  |
| Malathion        | 1 (0.4%) | 0         | 9 (0.8%)  | 10 (1.4%) | -         | 3 (0.4%)  | -         | 162 (7.4%)  | 1 (0.3%)  |
| Chlorpyrifos     | -        | -         | 1 (0.1%)  | 3 (0.4%)  | -         | 0         | -         | 79 (3.6%)   | -         |
| Parathion        | 1 (0.4%) | -         | 57 (5.0%) | -         | -         | -         | -         | 17 (0.8%)   | -         |
| Diazinon         | 0        | -         | 3 (0.3%)  | 11 (1.6%) | -         | 2 (0.3%)  | -         | 54 (2.5%)   | 2 (0.5%)  |
| Pyrethroids      | -        | -         | 19 (1.7%) | 22 (3.1%) | -         | 2 (0.3%)  | 17 (3.8%) | 65 (3.0%)   | 1 (0.3%)  |
| Permethrin       | -        | -         | 3 (0.3%)  | 1 (0.1%)  | -         | 1 (0.2%)  | -         | 34 (1.6%)   | 1 (0.3%)  |
| Carbamates       | -        | -         | 49 (4.3%) | 17 (2.4%) | 12 (0.5%) | 1 (0.2%)  | -         | 159 (7.3%)  | 0         |
| Carbaryl         | -        | -         | 16 (1.4%) | 15 (2.1%) | -         | 0         | -         | 115 (5.3%)  | 0         |

Footnote: The symbol " - " indicates that the study was not included in analysis of the particular insecticide, due to no exposed case or control

**Supplemental Figure 1. Comparison of studies with exposure coding based on expert assessment or self-report, for the association between ever use of insecticides (vs. never-use) and risk of all NHL. Odds ratio (OR) and 95% confidence interval (CI) with adjustment in the main analysis for study center, age, gender, socioeconomic status (SES), herbicides, and other non-insecticide pesticides.**

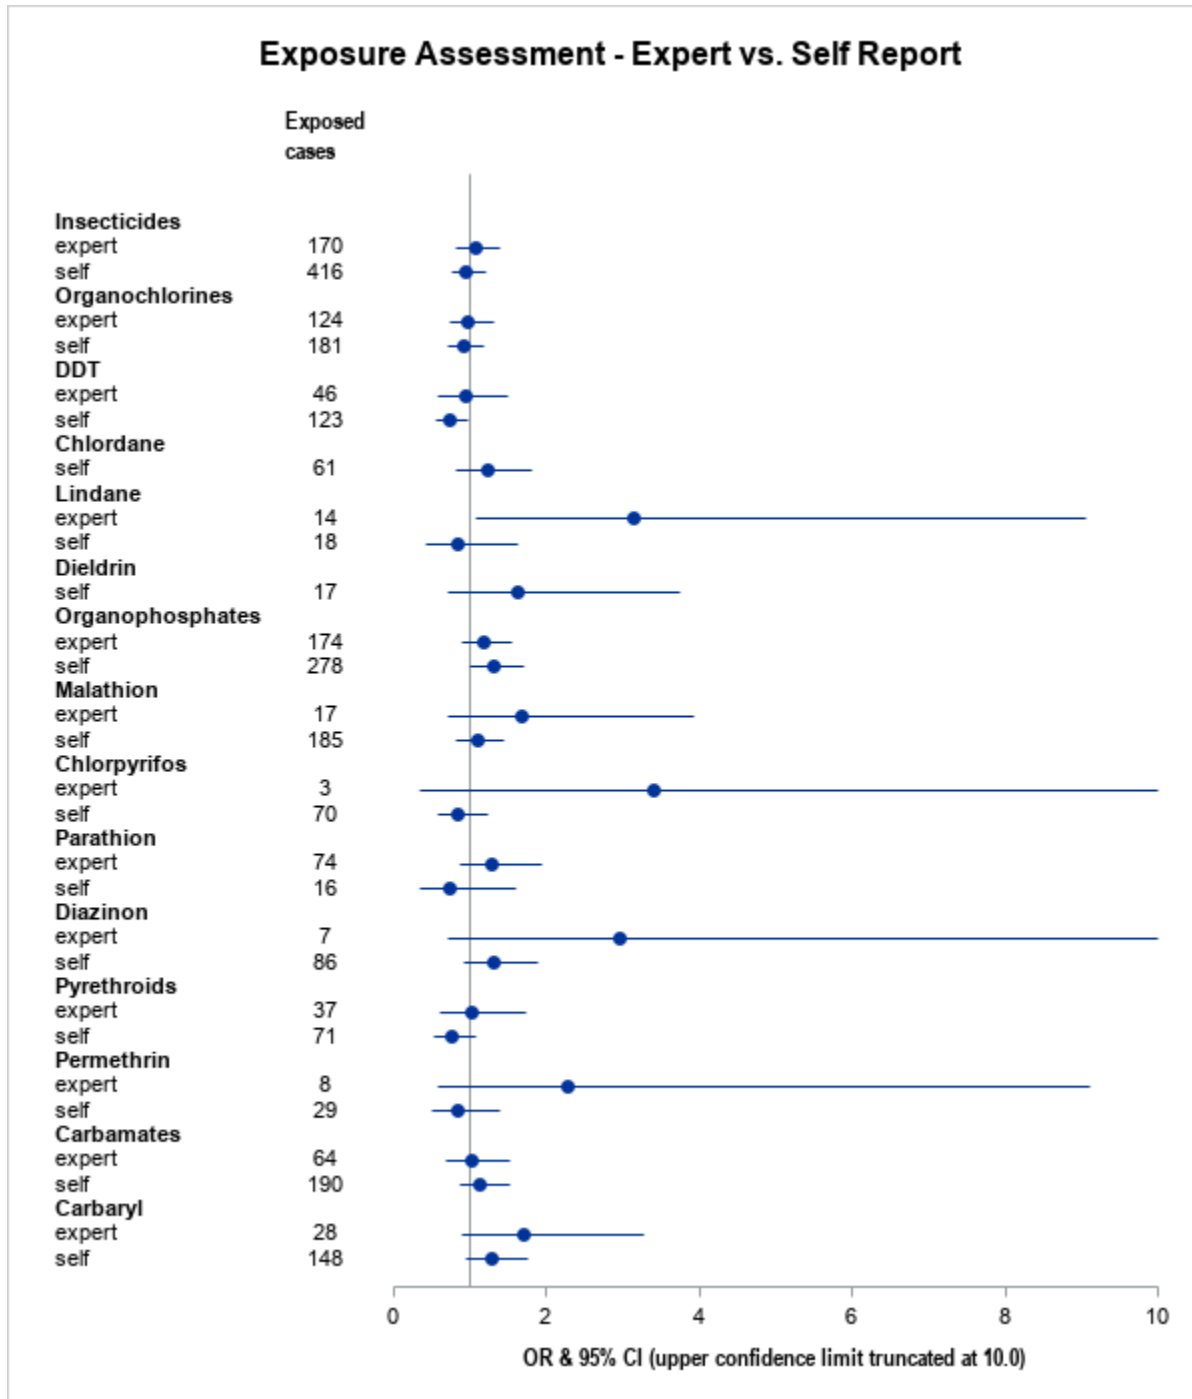

**Supplemental Figure 2. Random effects meta-analysis of the association between occupational insecticide use and NHL risk. Individual-study estimates are odds ratios (OR) and 95% confidence intervals (CI) for insecticide exposure (vs. never-use), with adjustment for study center, age, gender, socioeconomic status (SES), herbicides, and other non-insecticide pesticides.**

Any type of insecticides, ever-use

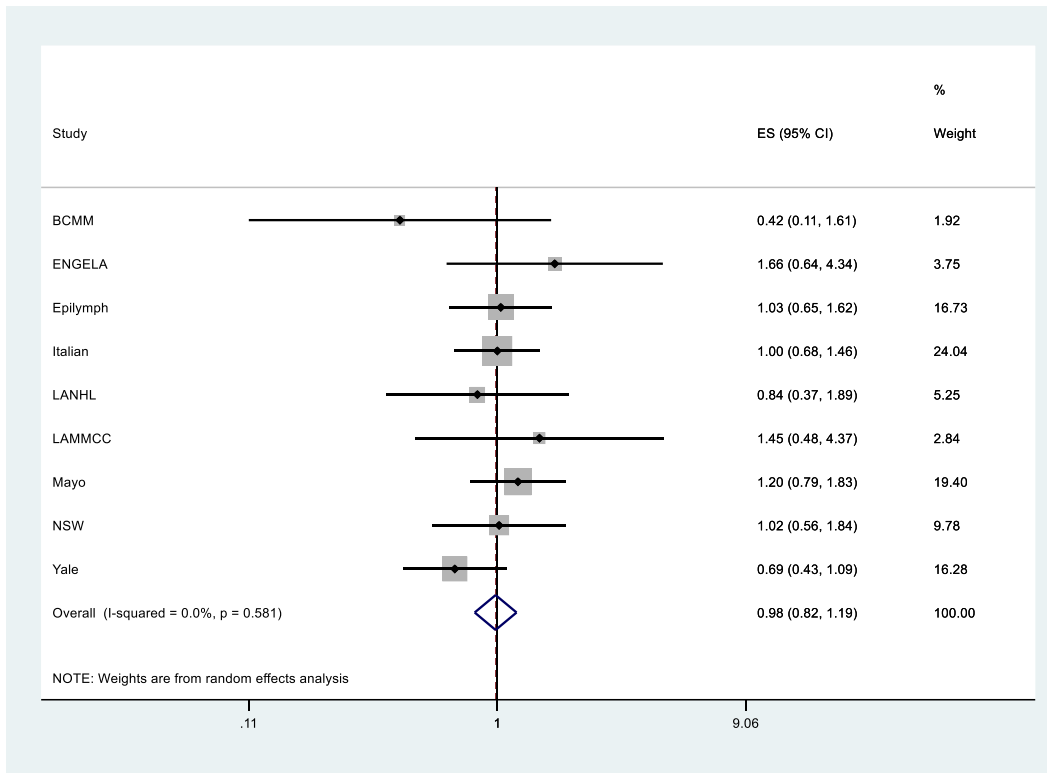

Any type of insecticides, duration >10 years

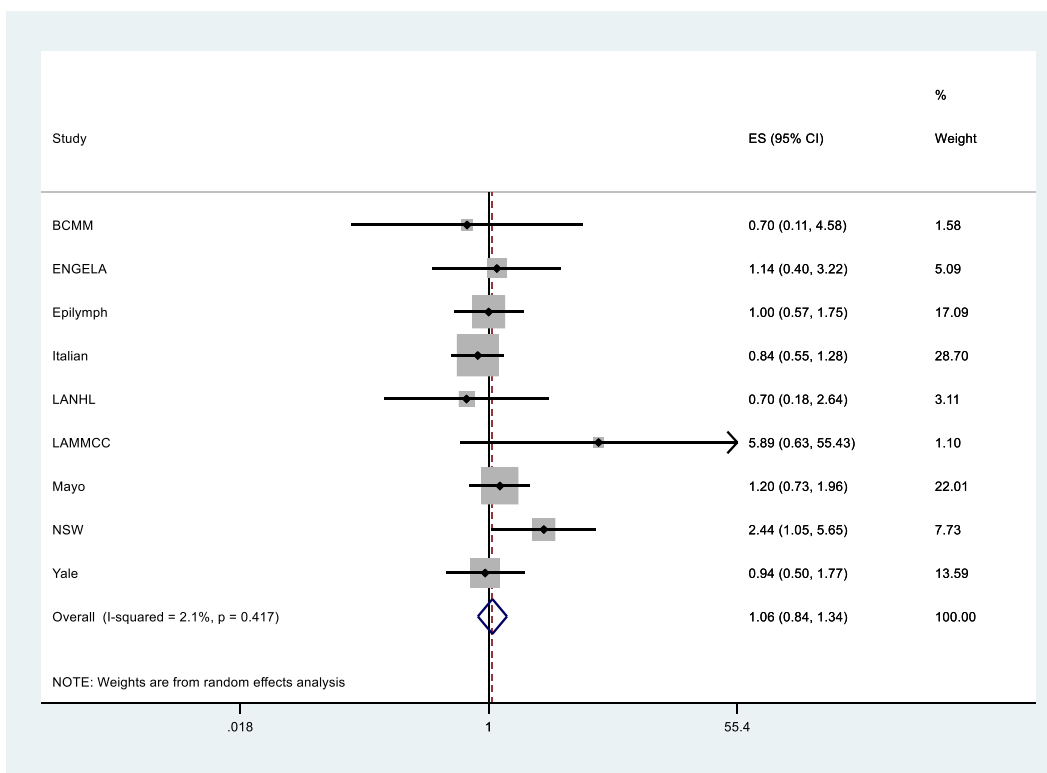

## Organochlorines, ever-use

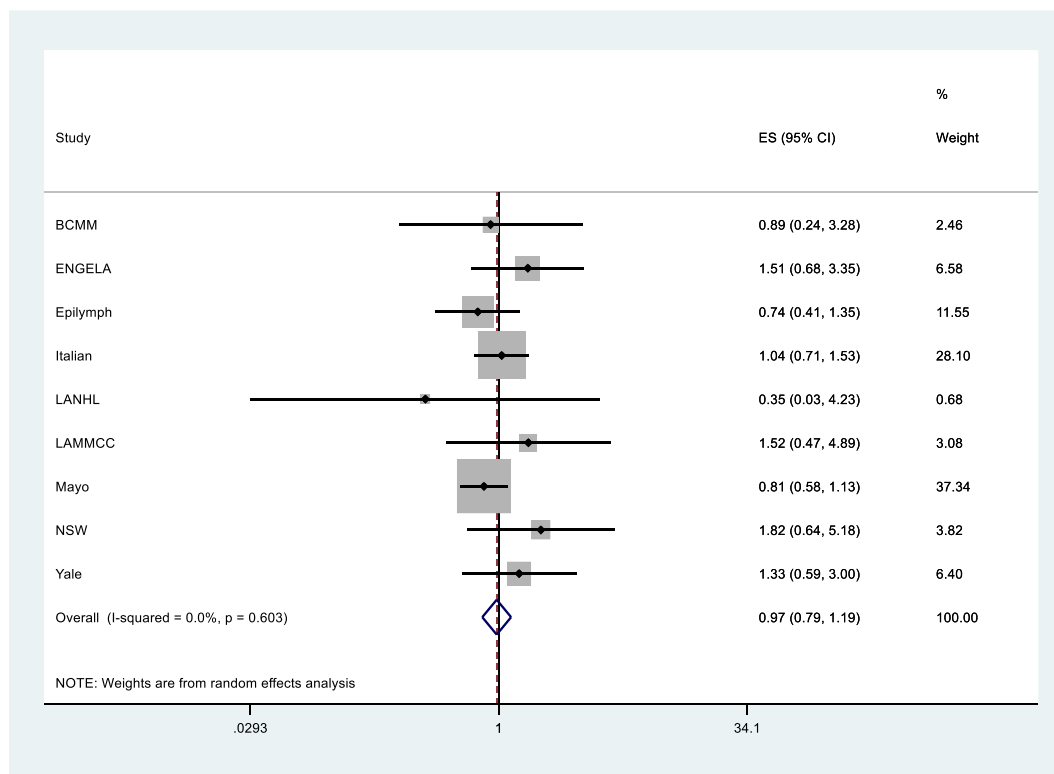

## Organophosphates, ever-use (LANHL not shown due to sparse data and ~0% weight)

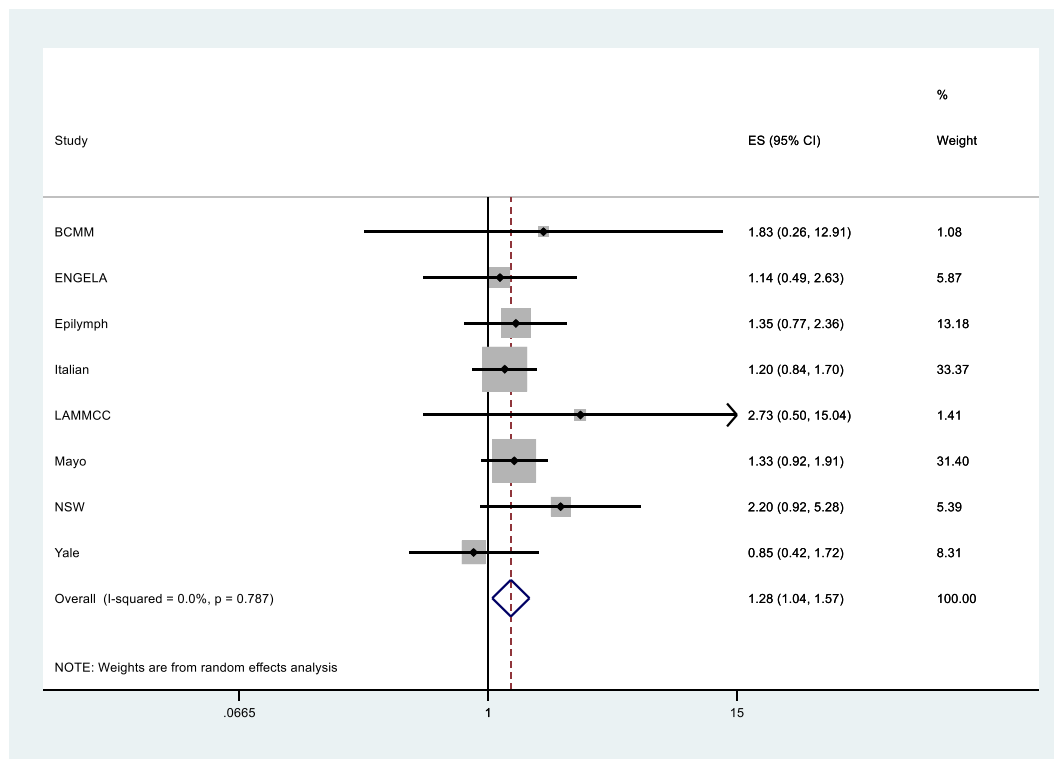

## Organophosphates, lagged-use duration >50<sup>th</sup> percentile

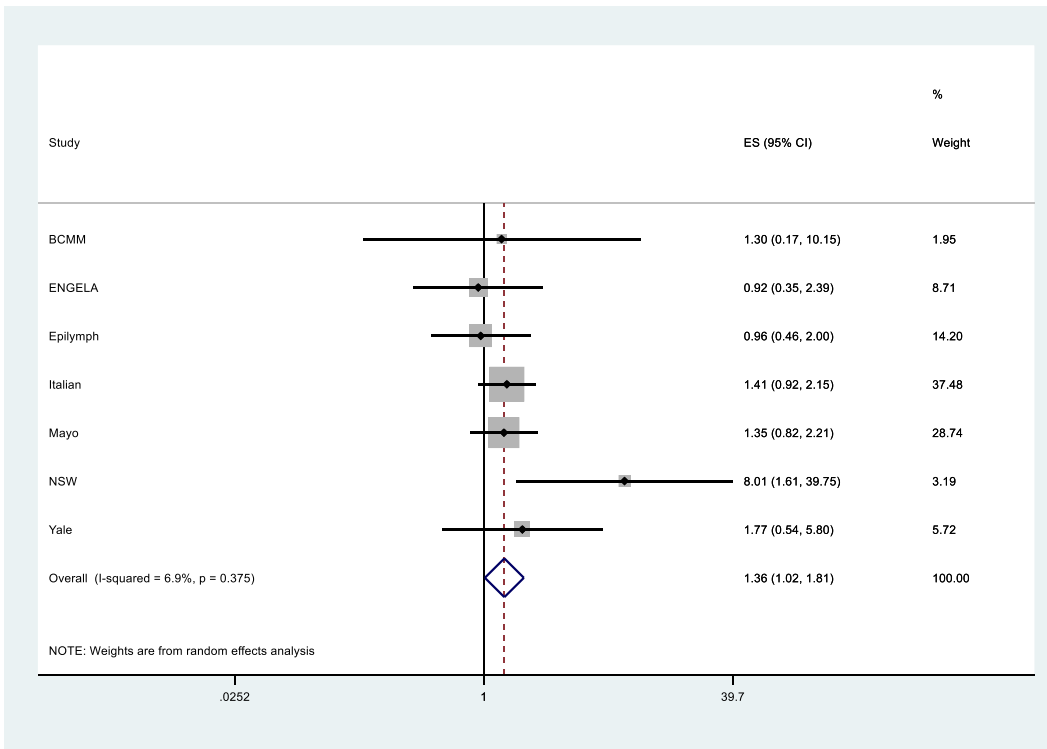

## Organophosphates, ever-use, follicular lymphoma

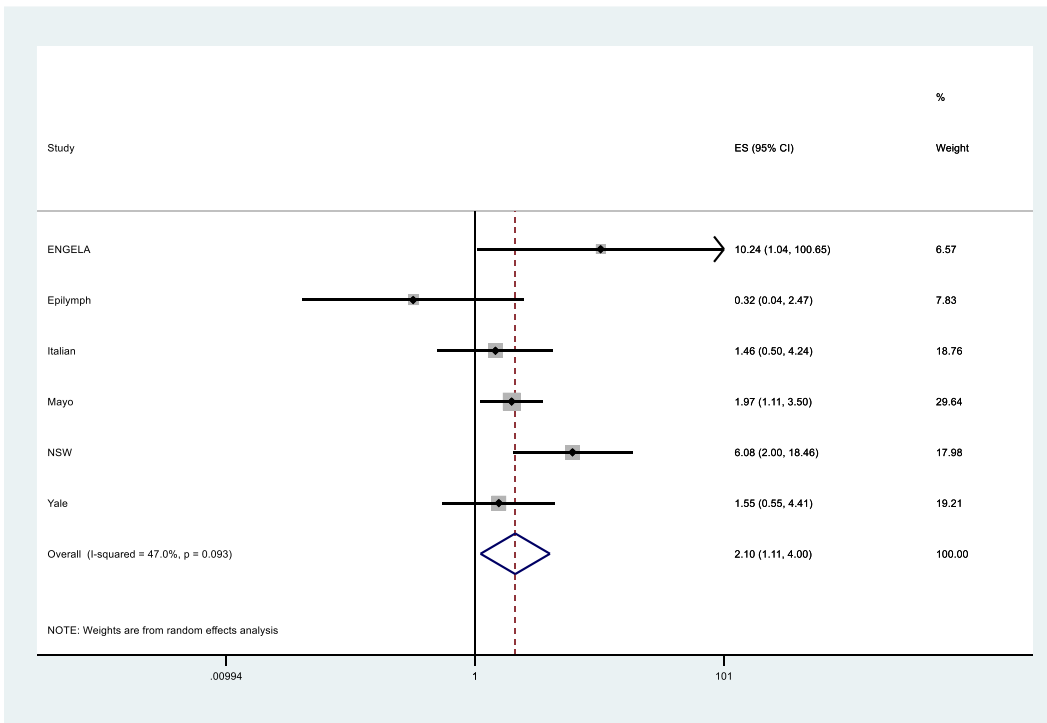

Diazinon, ever-use (LAMMCC not shown due to sparse data and ~0% weight)

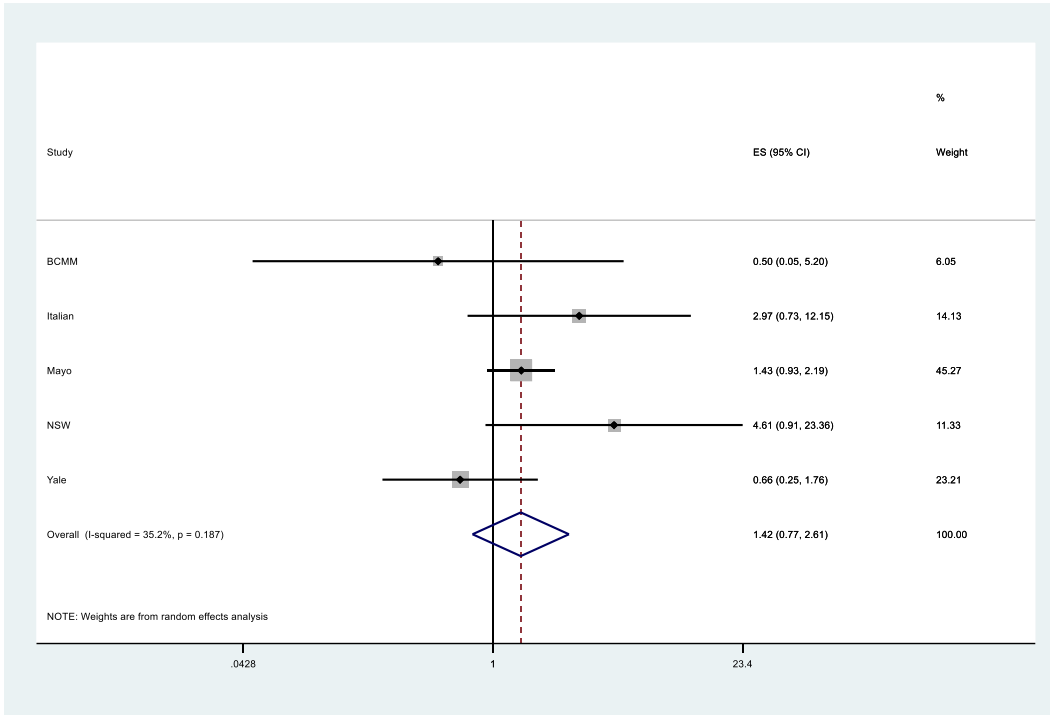

Diazinon, lagged-use duration >50<sup>th</sup> percentile (NSW not shown due to sparse data and ~0% weight)

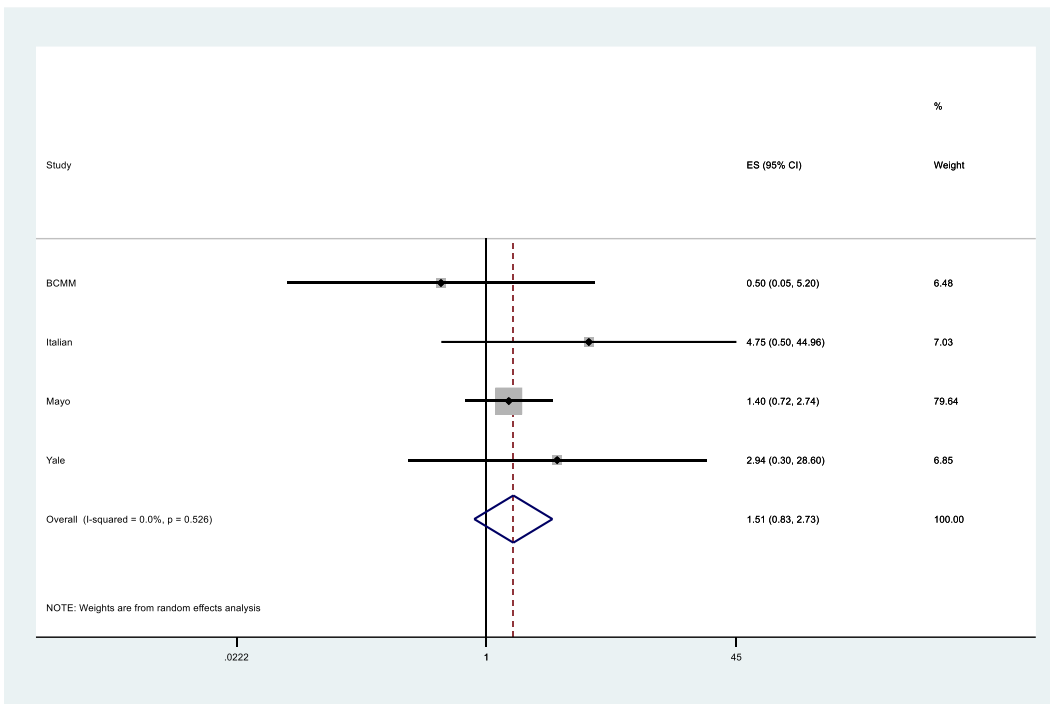

## Diazinon, ever-use, follicular lymphoma

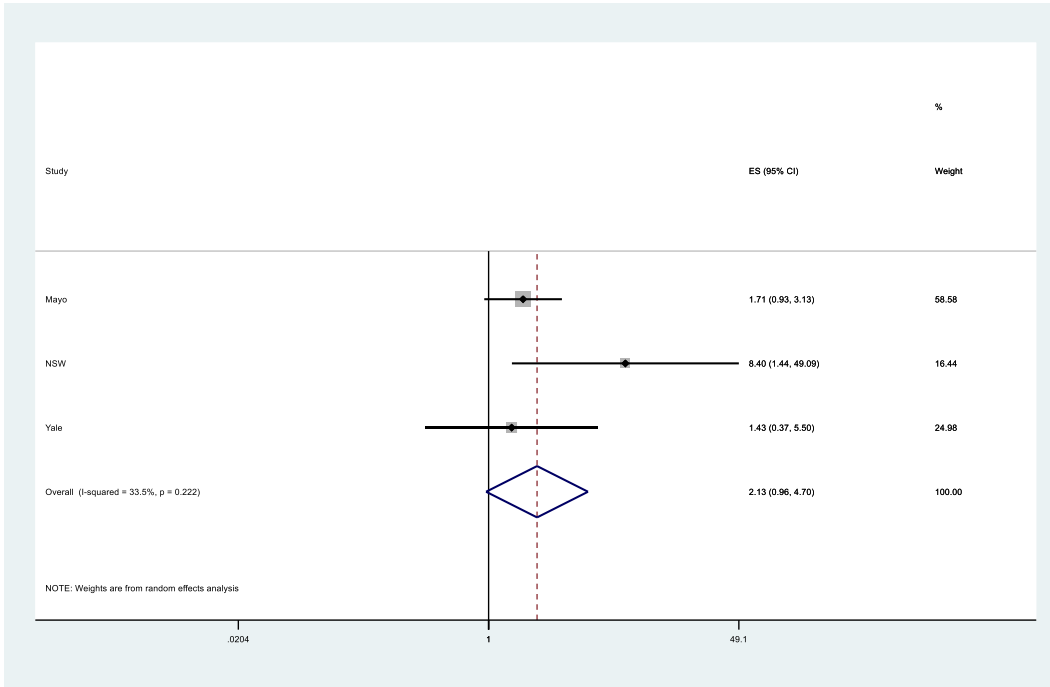

## Pyrethroids, ever-use

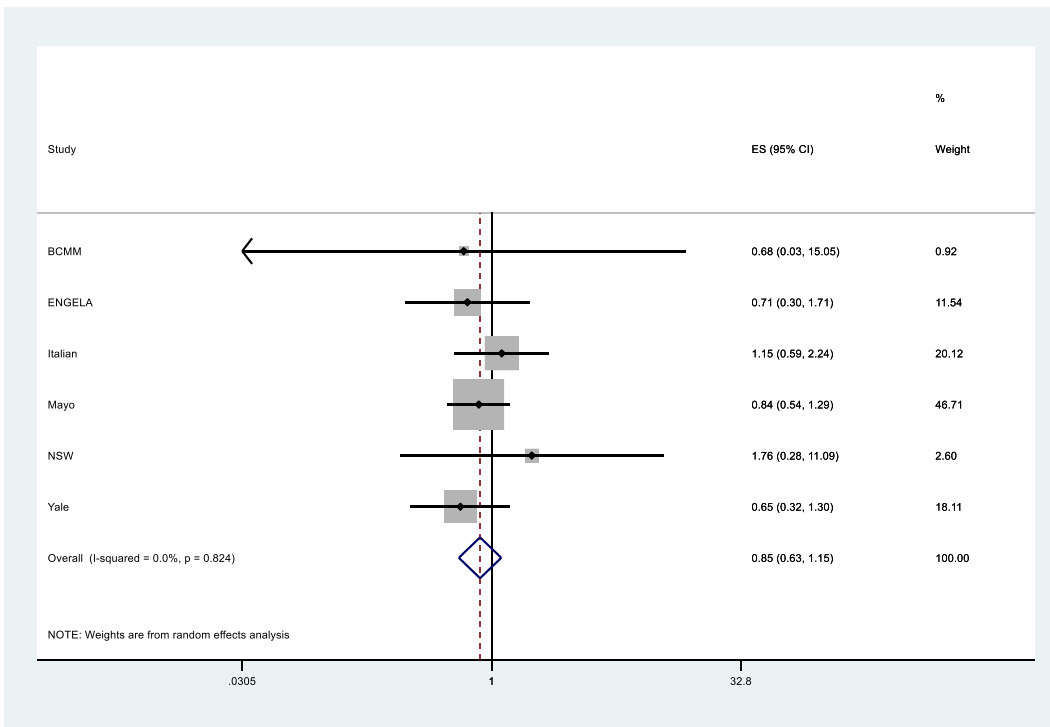



Carbaryl, ever-use (NSW and BCMM not shown due to sparse data and ~0% weight)

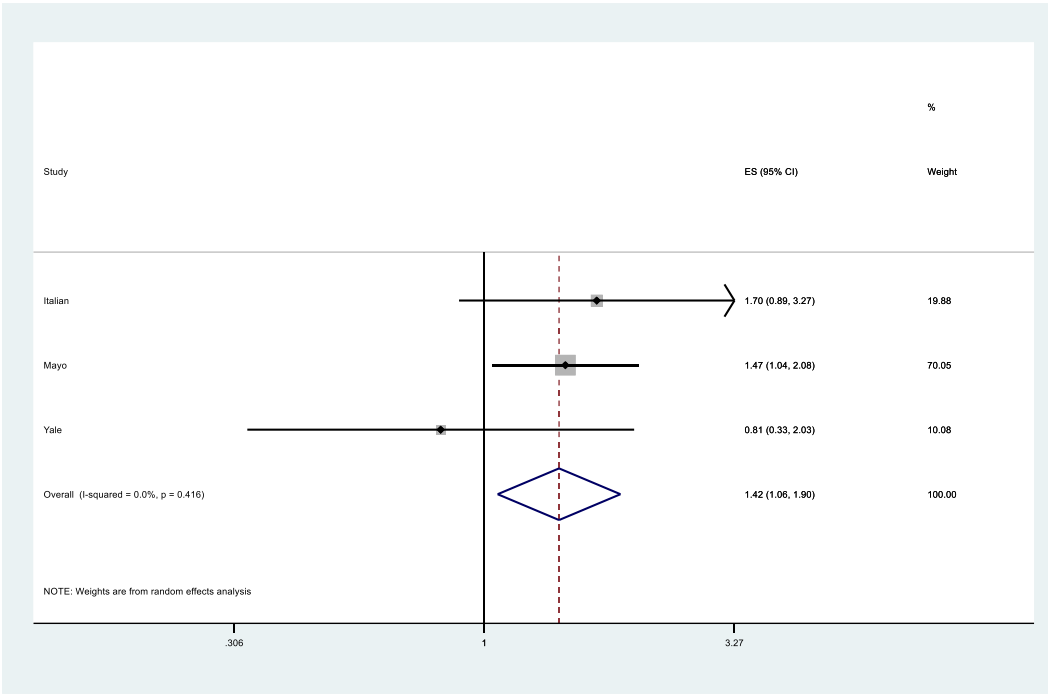

Carbaryl, lagged-use duration >50<sup>th</sup> percentile

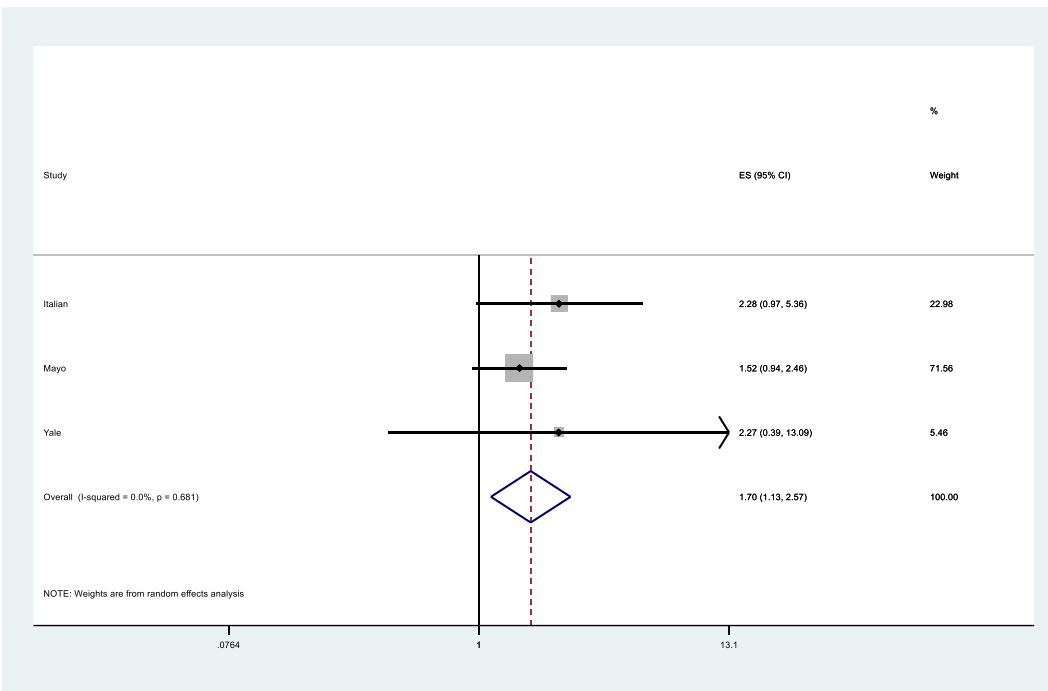

## Carbaryl, ever-use, follicular lymphoma

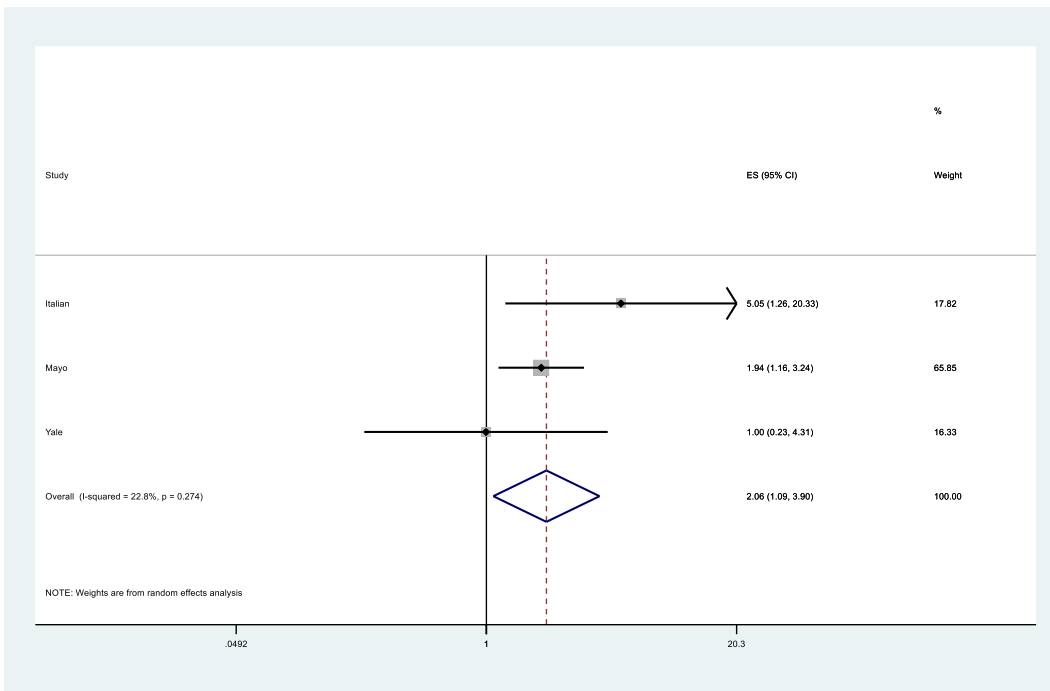

## Carbaryl, ever-use, T-cell lymphoma

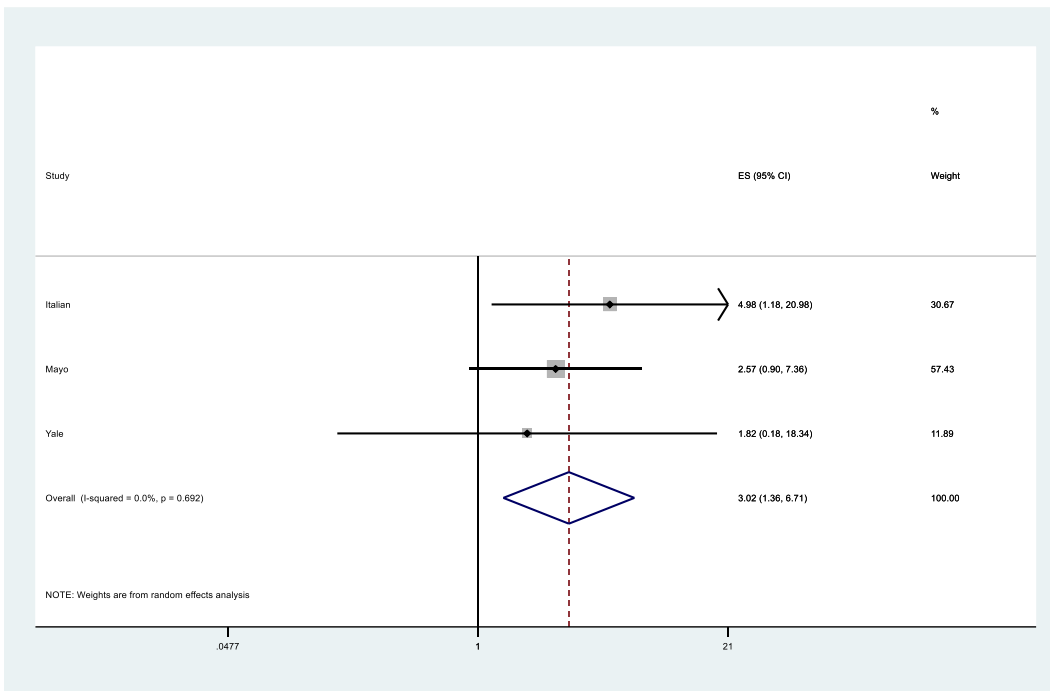

Supplement: NIHMS1933525-supplement-Supplementary_text.pdf [file NIHMS1933525-supplement-Supplementary_text.pdf]
